# Supplementary material for: Association of non-alcoholic fatty liver disease and all-cause mortality in hospitalized cardiovascular disease patients: A systematic review and meta-analysis
Source: PubMed Central journal article supplement — Medicine (Baltimore). 2021 Feb 5;100(5):e24557. doi: 10.1097/MD.0000000000024557 (PMC7870191; doi:10.1097/md.0000000000024557), 2021-02-05
Supplement: medi-100-e24557-s001.pdf [file medi-100-e24557-s001.pdf]

**Table S1** Search algorithms

| Database | No  | Step search algorithm                                                                                                                                                                                                                                                                                                                                                                                                                                                   | Items found |
|----------|-----|-------------------------------------------------------------------------------------------------------------------------------------------------------------------------------------------------------------------------------------------------------------------------------------------------------------------------------------------------------------------------------------------------------------------------------------------------------------------------|-------------|
| Pubmed   | #1  | Search Nonalcoholic Fatty Liver Disease                                                                                                                                                                                                                                                                                                                                                                                                                                 | 17760       |
|          | #2  | Search Fatty Liver, Nonalcoholic                                                                                                                                                                                                                                                                                                                                                                                                                                        | 18393       |
|          | #3  | Search Fatty Livers, Nonalcoholic                                                                                                                                                                                                                                                                                                                                                                                                                                       | 13726       |
|          | #4  | Search Liver, Nonalcoholic Fatty                                                                                                                                                                                                                                                                                                                                                                                                                                        | 18393       |
|          | #5  | Search Livers, Nonalcoholic Fatty                                                                                                                                                                                                                                                                                                                                                                                                                                       | 13726       |
|          | #6  | Search Nonalcoholic Fatty Liver                                                                                                                                                                                                                                                                                                                                                                                                                                         | 18393       |
|          | #7  | Search Nonalcoholic Fatty Livers                                                                                                                                                                                                                                                                                                                                                                                                                                        | 13726       |
|          | #8  | Search Nonalcoholic Steatohepatitis                                                                                                                                                                                                                                                                                                                                                                                                                                     | 16051       |
|          | #9  | Search Nonalcoholic Steatohepatitides                                                                                                                                                                                                                                                                                                                                                                                                                                   | 13400       |
|          | #10 | Search Steatohepatitides, Nonalcoholic                                                                                                                                                                                                                                                                                                                                                                                                                                  | 13400       |
|          | #11 | Search Steatohepatitis, Nonalcoholic                                                                                                                                                                                                                                                                                                                                                                                                                                    | 16051       |
|          | #12 | Search (((((((((((Steatohepatitis, Nonalcoholic) OR Steatohepatitides, Nonalcoholic) OR Nonalcoholic Steatohepatitides) OR Nonalcoholic Steatohepatitis) OR Nonalcoholic Fatty Livers) OR Nonalcoholic Fatty Liver) OR Livers, Nonalcoholic Fatty) OR Liver, Nonalcoholic Fatty) OR Fatty Livers, Nonalcoholic) OR Fatty Liver, Nonalcoholic) OR Nonalcoholic Fatty Liver Disease) OR NAFLD) OR Non-alcoholic Fatty Liver Disease) OR non-alcoholic fatty liver disease | 20067       |
|          | #13 | Search mortality                                                                                                                                                                                                                                                                                                                                                                                                                                                        | 1145113     |
|          | #14 | Search Mortalities                                                                                                                                                                                                                                                                                                                                                                                                                                                      | 1149041     |
|          | #15 | Search Case Fatality Rate                                                                                                                                                                                                                                                                                                                                                                                                                                               | 1147504     |
|          | #16 | Search Case Fatality Rates                                                                                                                                                                                                                                                                                                                                                                                                                                              | 1146113     |
|          | #17 | Search Rate, Case Fatality                                                                                                                                                                                                                                                                                                                                                                                                                                              | 1147504     |
|          | #18 | Search Rates, Case Fatality                                                                                                                                                                                                                                                                                                                                                                                                                                             | 1146113     |
|          | #19 | Search Mortality, Excess                                                                                                                                                                                                                                                                                                                                                                                                                                                | 1145113     |
|          | #20 | Search Excess Mortalities                                                                                                                                                                                                                                                                                                                                                                                                                                               | 1145161     |
|          | #21 | Search Mortalities, Excess                                                                                                                                                                                                                                                                                                                                                                                                                                              | 1145161     |
|          | #22 | Search Excess Mortality                                                                                                                                                                                                                                                                                                                                                                                                                                                 | 1145113     |
|          | #23 | Search Decline, Mortality                                                                                                                                                                                                                                                                                                                                                                                                                                               | 1145113     |
|          | #24 | Search Declines, Mortality                                                                                                                                                                                                                                                                                                                                                                                                                                              | 1145113     |
|          | #25 | Search Mortality Declines                                                                                                                                                                                                                                                                                                                                                                                                                                               | 1145113     |
|          | #26 | Search Mortality Decline                                                                                                                                                                                                                                                                                                                                                                                                                                                | 1145113     |
|          | #27 | Search Mortality Determinants                                                                                                                                                                                                                                                                                                                                                                                                                                           | 1145113     |
|          | #28 | Search Determinant, Mortality                                                                                                                                                                                                                                                                                                                                                                                                                                           | 1145113     |
|          | #29 | Search Mortality Determinant                                                                                                                                                                                                                                                                                                                                                                                                                                            | 1145113     |
|          | #30 | Search Determinants, Mortality                                                                                                                                                                                                                                                                                                                                                                                                                                          | 1145113     |
|          | #31 | Search Mortality, Differential                                                                                                                                                                                                                                                                                                                                                                                                                                          | 1145113     |
|          | #32 | Search Differential Mortalities                                                                                                                                                                                                                                                                                                                                                                                                                                         | 1145186     |
|          | #33 | Search Mortalities, Differential                                                                                                                                                                                                                                                                                                                                                                                                                                        | 1145186     |
|          | #34 | Search Differential Mortality                                                                                                                                                                                                                                                                                                                                                                                                                                           | 1145113     |
|          | #35 | Search Age-Specific Death Rate                                                                                                                                                                                                                                                                                                                                                                                                                                          | 1146099     |
|          | #36 | Search Age-Specific Death Rates                                                                                                                                                                                                                                                                                                                                                                                                                                         | 1145890     |
|          | #37 | Search Death Rate, Age-Specific                                                                                                                                                                                                                                                                                                                                                                                                                                         | 1146099     |
|          | #38 | Search Death Rates, Age-Specific                                                                                                                                                                                                                                                                                                                                                                                                                                        | 1145890     |







| Database | No  | Step search algorithm                                                                                                                                                                                                                                                                                                                                                                                                                                                                                                                                                          | Items found |
|----------|-----|--------------------------------------------------------------------------------------------------------------------------------------------------------------------------------------------------------------------------------------------------------------------------------------------------------------------------------------------------------------------------------------------------------------------------------------------------------------------------------------------------------------------------------------------------------------------------------|-------------|
|          |     | OR Rate, Case Fatality) OR Case Fatality Rates) OR Case Fatality Rate) OR Mortalities) OR mortality)) AND ((((((((((((((Steatohepatitis, Nonalcoholic) OR Steatohepatitides, Nonalcoholic) OR Nonalcoholic Steatohepatitides) OR Nonalcoholic Steatohepatitis) OR Nonalcoholic Fatty Livers) OR Nonalcoholic Fatty Liver) OR Livers, Nonalcoholic Fatty) OR Liver, Nonalcoholic Fatty) OR Fatty Livers, Nonalcoholic) OR Fatty Liver, Nonalcoholic) OR Nonalcoholic Fatty Liver Disease) OR NAFLD) OR Non alcoholic Fatty Liver Disease) OR non-alcoholic fatty liver disease) |             |
| Cochran  | #1  | ("non-alcoholic fatty liver disease") OR ("Non alcoholic Fatty Liver Disease") OR ("NAFLD") OR ("Nonalcoholic Fatty Liver Disease") OR ("Fatty Liver, Nonalcoholic") (Word variations have been searched)                                                                                                                                                                                                                                                                                                                                                                      | 1442        |
|          | #2  | ("Nonalcoholic Steatohepatitis") OR ("Nonalcoholic Steatohepatitides") OR ("Steatohepatitides, Nonalcoholic") OR ("Steatohepatitis, Nonalcoholic") (Word variations have been searched)                                                                                                                                                                                                                                                                                                                                                                                        | 1597        |
|          | #3  | #1 OR #2                                                                                                                                                                                                                                                                                                                                                                                                                                                                                                                                                                       | 609         |
|          | #4  | ("mortality") OR ("Mortalities") OR ("Case Fatality Rate") OR ("Case Fatality Rates") OR ("Rate, Case Fatality") (Word variations have been searched)                                                                                                                                                                                                                                                                                                                                                                                                                          | 72408       |
|          | #5  | ("Rates, Case Fatality") OR ("Mortality, Excess") OR ("Excess Mortalities") OR ("Mortalities, Excess") OR ("Excess Mortality") (Word variations have been searched)                                                                                                                                                                                                                                                                                                                                                                                                            | 318         |
|          | #6  | ("Rates, Case Fatality") OR ("Mortality, Excess") OR ("Excess Mortalities") OR ("Mortalities, Excess") OR ("Excess Mortality") (Word variations have been searched)                                                                                                                                                                                                                                                                                                                                                                                                            | 42          |
|          | #7  | ("Decline, Mortality") OR ("Declines, Mortality") OR ("Mortality Declines") OR ("Mortality Decline") OR ("Mortality Determinants") (Word variations have been searched)                                                                                                                                                                                                                                                                                                                                                                                                        | 50          |
|          | #8  | ("Determinant, Mortality") OR ("Mortality Determinant") OR ("Determinants, Mortality") OR ("Mortality, Differential") OR ("Differential Mortalities") (Word variations have been searched)                                                                                                                                                                                                                                                                                                                                                                                     | 21          |
|          | #9  | ("Mortalities, Differential") OR ("Differential Mortality") OR ("Age-Specific Death Rate") OR ("Age-Specific Death Rates") OR ("Death Rate, Age-Specific") (Word variations have been searched)                                                                                                                                                                                                                                                                                                                                                                                | 1215        |
|          | #10 | ("Death Rates, Age-Specific") OR ("Rate, Age-Specific Death") OR ("Rates, Age-Specific Death") OR ("Age Specific Death Rate") OR ("Death Rate") (Word variations have been searched)                                                                                                                                                                                                                                                                                                                                                                                           | 9245        |
|          | #11 | ("Death Rates") OR ("Rate, Death") OR ("Rates, Death") OR ("Mortality Rate") OR ("Mortality Rates") (Word variations have been searched)                                                                                                                                                                                                                                                                                                                                                                                                                                       | 611         |

| Database | No  | Step search algorithm                                                                                                                                                                     | Items found  |
|----------|-----|-------------------------------------------------------------------------------------------------------------------------------------------------------------------------------------------|--------------|
|          | #12 | #4 OR #5 OR #6 OR #7 OR #8 OR #9 OR #10 OR #11                                                                                                                                            | 21980        |
|          | #13 | ("Cardiovascular Diseases") OR ("Cardiovascular Disease") OR ("Disease, Cardiovascular") OR ("Diseases, Cardiovascular") (Word variations have been searched)                             | 3564         |
|          | #14 | ("hospital mortalities") OR ("Mortality, In-Hospital") OR ("In-Hospital Mortalities") OR ("Mortalities, In-Hospital") OR ("In-Hospital Mortality") (Word variations have been searched)   | 897          |
|          | #15 | ("Mortality, Hospital") OR ("Mortalities, Hospital") OR ("Mortalities, In-house") OR ("In-house Mortalities") OR ("In-house Mortality") (Word variations have been searched)              | 3468         |
|          | #16 | ("Mortalities, In house") OR ("Mortality, In-house") OR ("Mortality, Inhospital") OR ("Hospital Mortalities") OR ("In Hospital Mortalities") (Word variations have been searched)         | 1643         |
|          | #17 | ("Inhospital Mortalities") OR ("Mortalities, Inhospital") OR ("In Hospital Mortality") OR ("Hospital Mortalities, In") OR ("Hospital Mortality, In") (Word variations have been searched) | 1528         |
|          | #18 | ("Mortalities, In Hospital") OR ("Mortality, In Hospital") OR ("Inhospital Mortality") (Word variations have been searched)                                                               | 4265         |
|          | #19 | #14 OR #15 OR #16 OR #17 OR #18                                                                                                                                                           | 11546        |
|          | #20 | #3 AND #12 AND #13 AND #19                                                                                                                                                                | <b>0</b>     |
| EMBASE   | #1  | 'cardiovascular disease'/syn                                                                                                                                                              | 4,160,282    |
|          | #2  | 'stroke'/syn                                                                                                                                                                              | 74,203       |
|          | #3  | 'CVD'/syn                                                                                                                                                                                 | 49,164       |
|          | #4  | #1 OR #2 OR #3                                                                                                                                                                            | 4,238,733    |
|          | #5  | 'nonalcoholic fatty liver'/syn                                                                                                                                                            | 39,229       |
|          | #6  | 'NAFLD'/syn                                                                                                                                                                               | 21,404       |
|          | #7  | #5 OR #6                                                                                                                                                                                  | 40,545       |
|          | #8  | 'mortality'/syn                                                                                                                                                                           | 1,355,505    |
|          | #9  | 'hospital mortality'/syn                                                                                                                                                                  | 57,385       |
|          | #10 | #8 OR #9                                                                                                                                                                                  | 1,355,505    |
|          | #11 | #4 AND #7 AND #10                                                                                                                                                                         | <b>1,841</b> |
