# Supplementary material for: Association of non-alcoholic fatty liver disease and all-cause mortality in hospitalized cardiovascular disease patients: A systematic review and meta-analysis
Source: PubMed Central journal article supplement — Medicine (Baltimore). 2021 Feb 5;100(5):e24557. doi: 10.1097/MD.0000000000024557 (PMC7870191; doi:10.1097/md.0000000000024557), 2021-02-05
Supplement: medi-100-e24557-s002.pdf [file medi-100-e24557-s002.pdf]

**Table S2** Risk of bias assessment of cohort studies included in the meta-analysis by the Newcastle–Ottawa Scale

| <b>Author (Year)</b>       | <b>Adequacy selection of cohort</b>      |                                     |                           |                                                                          | <b>Comparability of studies</b>               |                    | <b>Outcome assessment</b> |                                                |                                  | <b>Total NOS score</b> |
|----------------------------|------------------------------------------|-------------------------------------|---------------------------|--------------------------------------------------------------------------|-----------------------------------------------|--------------------|---------------------------|------------------------------------------------|----------------------------------|------------------------|
|                            | Representativeness of the exposed cohort | Selection of the non-exposed cohort | Ascertainment of exposure | Demonstration that outcome of interest was not present at start of study | Study control for age, sex and marital status | Additional factors | Assessment of outcome     | Was follow-up long enough for outcome to occur | Adequacy of follow up of cohorts |                        |
| Valbusa F, et al. (2018)   | *                                        | *                                   | *                         | *                                                                        | *                                             | -                  | -                         | *                                              | *                                | <b>7/9</b>             |
| Tziomalos K, et al. (2013) | *                                        | *                                   | *                         | *                                                                        | -                                             | *                  | -                         | *                                              | *                                | <b>7/9</b>             |

NOS, Newcastle–Ottawa Scale
