# Supplementary material for: Association of non-alcoholic fatty liver disease and all-cause mortality in hospitalized cardiovascular disease patients: A systematic review and meta-analysis
Source: PubMed Central journal article supplement — Medicine (Baltimore). 2021 Feb 5;100(5):e24557. doi: 10.1097/MD.0000000000024557 (PMC7870191; doi:10.1097/md.0000000000024557), 2021-02-05
Supplement: medi-100-e24557-s003.pdf [file medi-100-e24557-s003.pdf]

**Table S3** Risk of bias assessment of case-control study included in the meta-analysis by the Newcastle–Ottawa Scale

| Author (Year)           | Adequacy selection of case-control |                                 |                       |                        | Comparability of studies                       |                    | Outcome assessment        |                                                     |                   | Total NOS score |
|-------------------------|------------------------------------|---------------------------------|-----------------------|------------------------|------------------------------------------------|--------------------|---------------------------|-----------------------------------------------------|-------------------|-----------------|
|                         | Is the case definition adequate?   | Representativeness of the cases | Selection of Controls | Definition of Controls | Study control for age, sex, and marital status | Additional factors | Ascertainment of exposure | Same method of ascertainment for cases and controls | Non-Response rate |                 |
| Keskin M, et al. (2017) | *                                  | *                               | -                     | *                      | *                                              | *                  | *                         | *                                                   | -                 | <b>7/9</b>      |

NOS, Newcastle–Ottawa Scale
