# Supplementary material for: Association of non-alcoholic fatty liver disease and all-cause mortality in hospitalized cardiovascular disease patients: A systematic review and meta-analysis
Source: PubMed Central journal article supplement — Medicine (Baltimore). 2021 Feb 5;100(5):e24557. doi: 10.1097/MD.0000000000024557 (PMC7870191; doi:10.1097/md.0000000000024557), 2021-02-05
Supplement: medi-100-e24557-s004.pdf [file medi-100-e24557-s004.pdf]

**Table S4** Description of confounder adjusts of included studies which reported adjusted outcomes

| Author, Year             | Age | Sex | Body weight | Body mass index | Waist circumference | SYNTAX score | Medication use | Comorbidities <sup>†</sup> |   |   |   |   |   |   |   | Laboratory value <sup>‡</sup> |   |   |   |   |   |   |   |   |    |    |    |    |    |
|--------------------------|-----|-----|-------------|-----------------|---------------------|--------------|----------------|----------------------------|---|---|---|---|---|---|---|-------------------------------|---|---|---|---|---|---|---|---|----|----|----|----|----|
|                          |     |     |             |                 |                     |              |                | 1                          | 2 | 3 | 4 | 5 | 6 | 7 | 8 | 1                             | 2 | 3 | 4 | 5 | 6 | 7 | 8 | 9 | 10 | 11 | 12 | 13 | 14 |
| Keskin M, et al. (2017)  | /   | /   |             | /               | /                   | /            | /              | /                          | / |   |   | / |   |   |   |                               | / | / | / | / | / | / | / |   |    |    |    |    |    |
| Valbusa F, et al. (2018) | /   | /   | /           |                 |                     |              | /              | /                          |   |   |   | / | / | / | / |                               | / |   |   |   |   |   |   | / | /  | /  | /  |    |    |

**†Comorbidities**

- |                           |                                          |
|---------------------------|------------------------------------------|
| 1. Diabetes               | 2. Hypertension                          |
| 3. Dyslipidemia           | 4. Obesity                               |
| 5. Chronic kidney disease | 6. Chronic obstructive pulmonary disease |
| 7. Heart failure          | 8. Coronary heart disease                |

**‡Laboratory value**

- |                                      |                               |                        |
|--------------------------------------|-------------------------------|------------------------|
| 1. Low density lipoprotein           | 2. Alanine transaminase level | 3. Blood pressure      |
| 4. Heart rate                        | 5. Glomerular filtration rate | 6. Blood urea nitrogen |
| 7. Complete blood count              | 8. Creatine kinase-MB         | 9. Troponin I          |
| 10. C-reactive protein               | 11. LV-ejection fraction      | 12. Serum albumin      |
| 13. NT pro-brain natriuretic peptide | 14. Gamma-glutamyltransferase |                        |
